# Supplementary material for: Blending ionic liquids: how physico-chemical properties change
Source: Royal Society of Chemistry journal article supplement (doi:10.1039/b921816e), 2010-01-01

## **Blending ionic liquids: How physico-chemical properties change.**

**Franca Castiglione,<sup>a</sup> Guido Raos<sup>a</sup>, Giovanni Battista Appetecchi,<sup>b</sup> Maria Montanino,<sup>b</sup> Stefano Passerini,<sup>b,c</sup> Margherita Moreno,<sup>b</sup> Antonino Famulari,<sup>a</sup> and Andrea Mele<sup>a</sup>**

<sup>s</sup> SUPPLEMENTARY ELECTRONIC INFORMATION

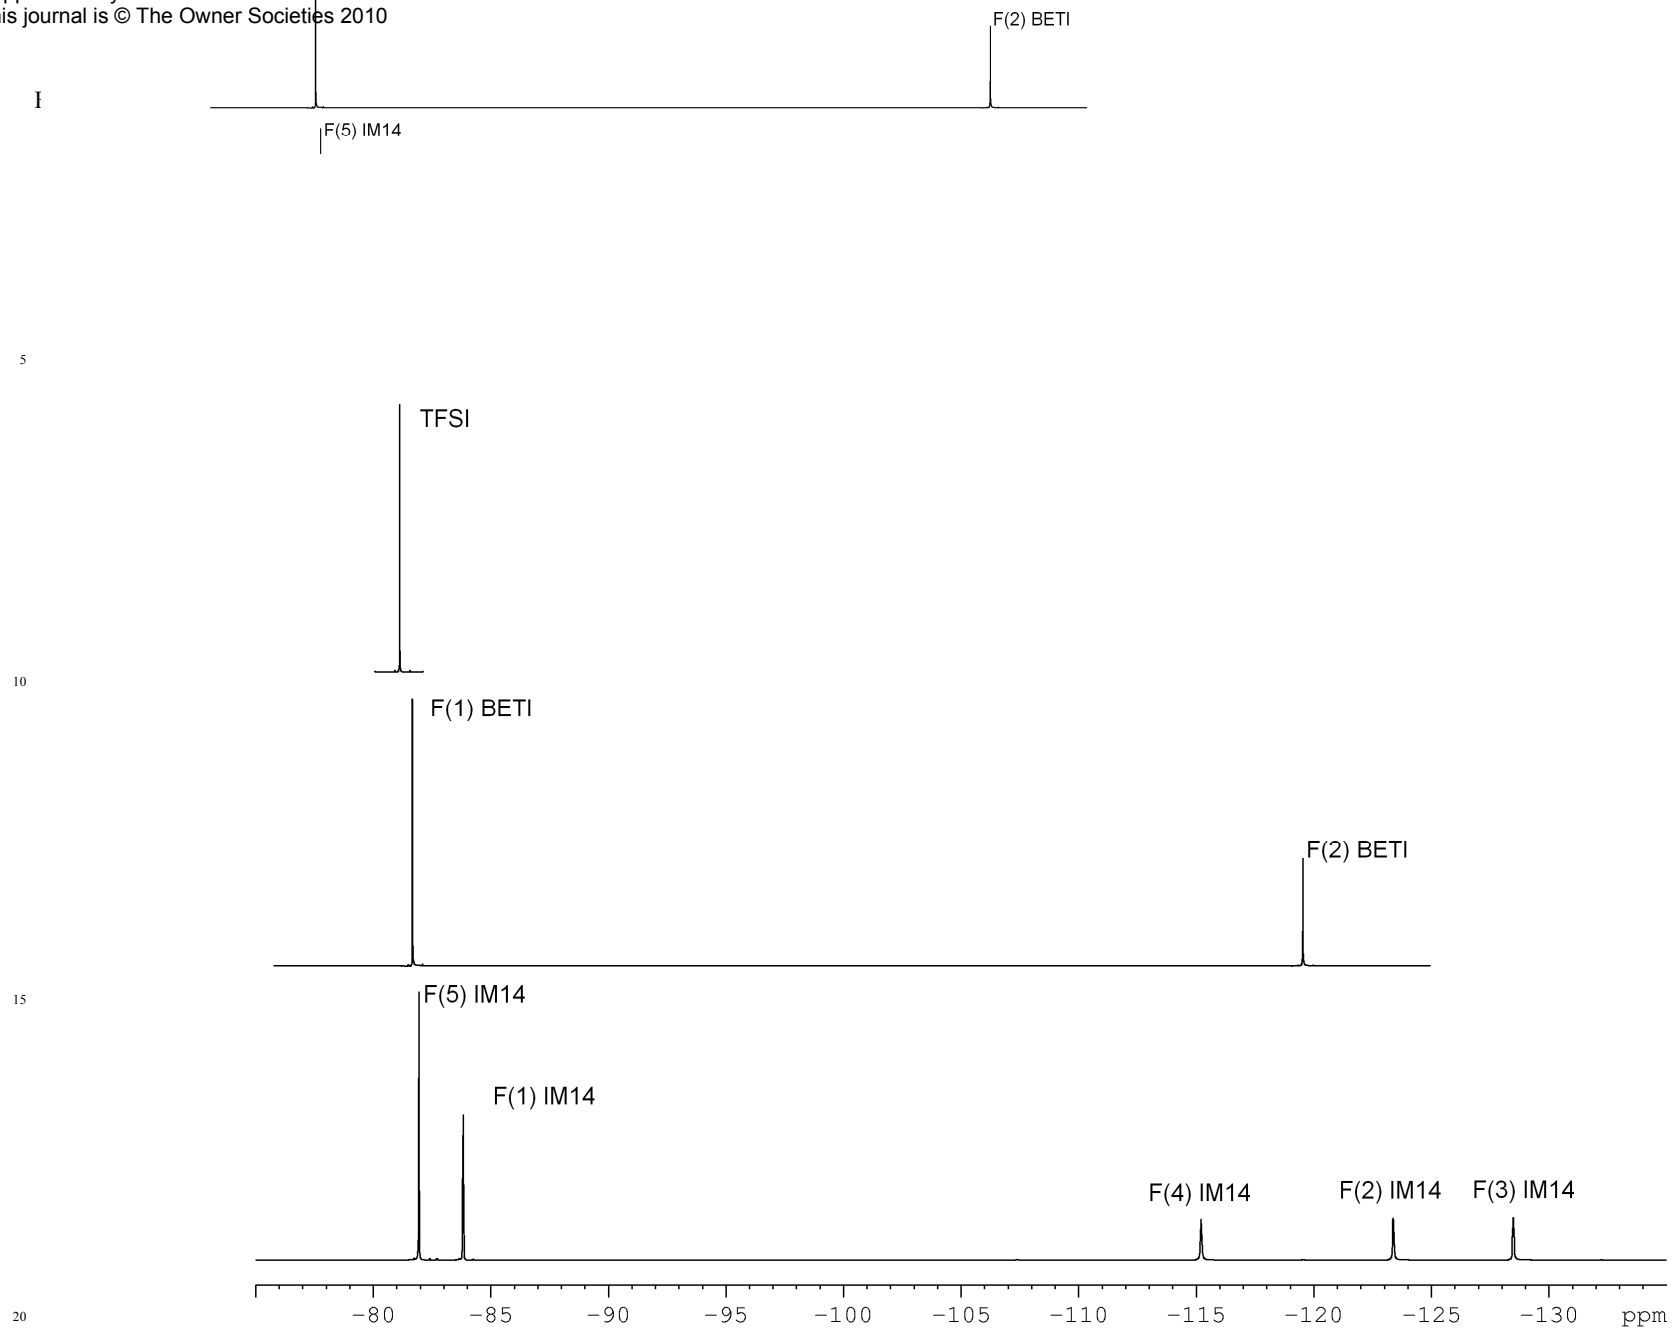

Figure S2. HOESY spectrum of AB mixture ( horizontal axis:  $^1\text{H}$  dimension, vertical axis  $^{19}\text{F}$  dimension)

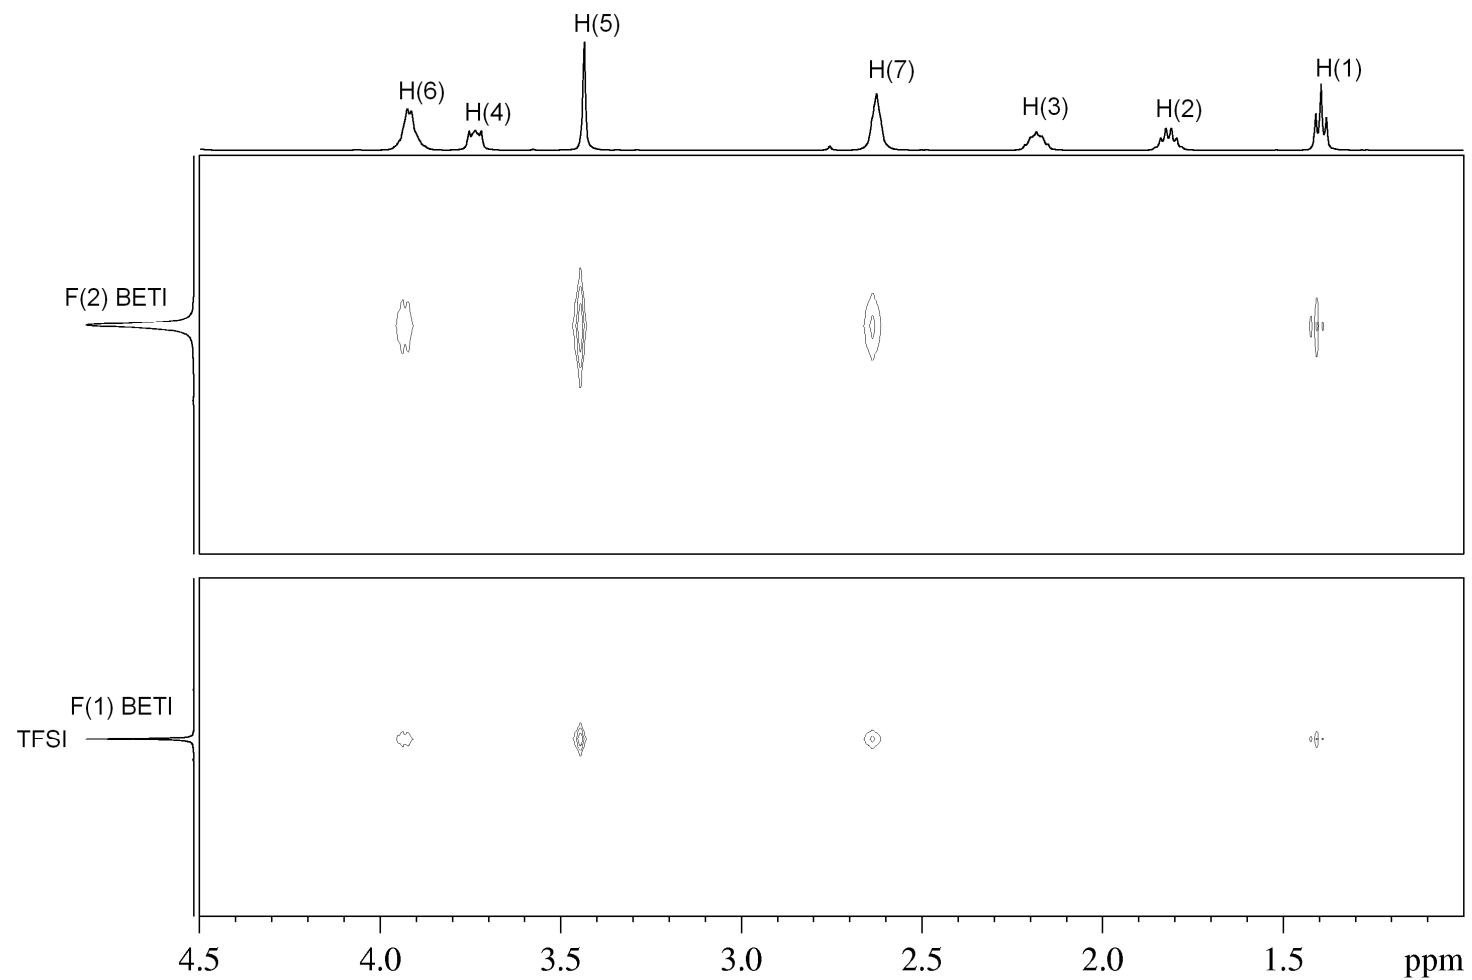

Figure S3.  $^{19}\text{F}$ - $^{19}\text{F}$  NOESY spectrum of ABC mixtrure

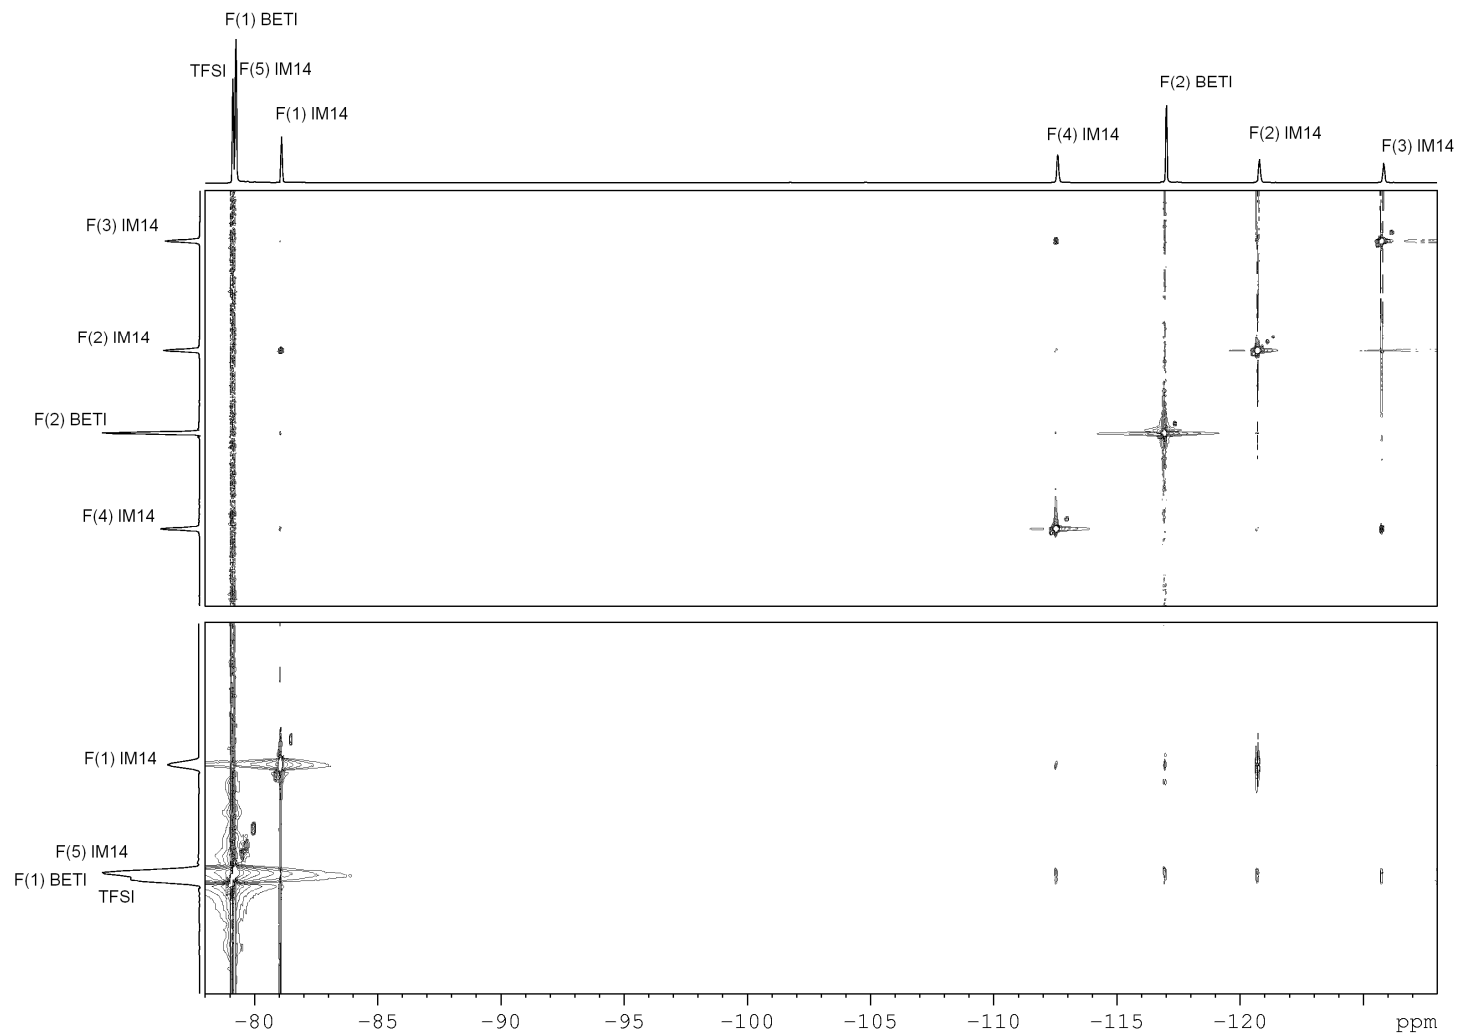

Figure S4.  $^{19}\text{F}$ - $^{19}\text{F}$  NOESY spectrum of pure C component.

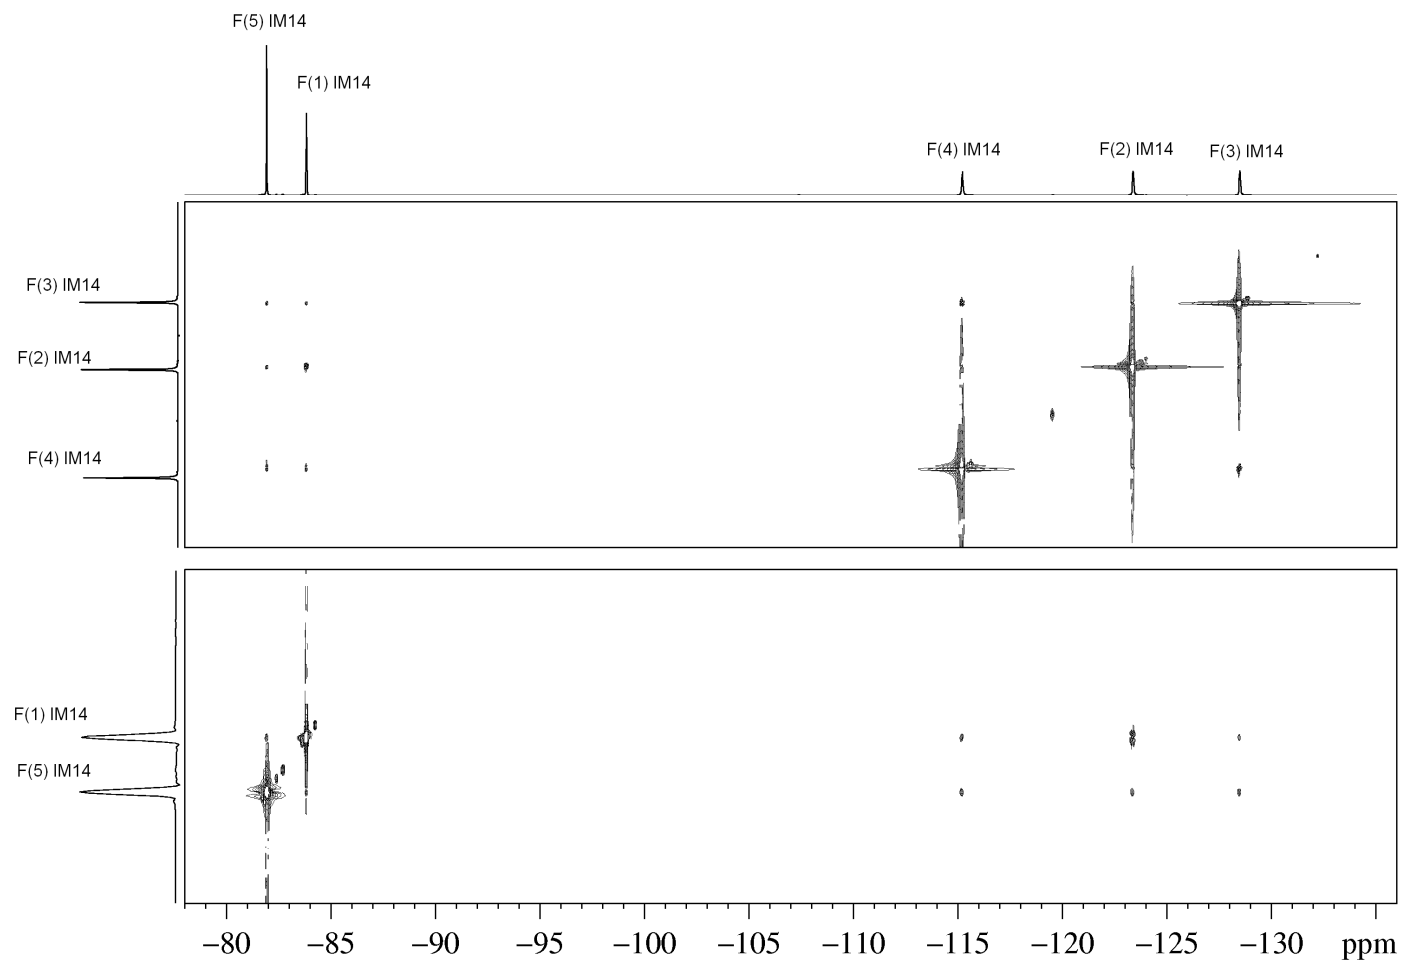

Supplement: b921816e.pdf [file b921816e.pdf]
